# Supplementary material for: Effect of water molecules on the diffusions of alkali metal ions in two-dimensional transition metal sulfides
Source: Royal Society of Chemistry journal article supplement (doi:10.1039/d6ra00840b), 2026-03-30
Supplement: d6ra00840b1.pdf [file d6ra00840b1.pdf]

# Effect of water molecules on the diffusions of alkali metal ions in two-dimensional transition metal sulfides

Jing Tian and Xiao Gu\*

School of Physical Science and Technology, Ningbo University, Ningbo 315211, China

Email: guxiao@nbu.edu.cn

## Supporting Information

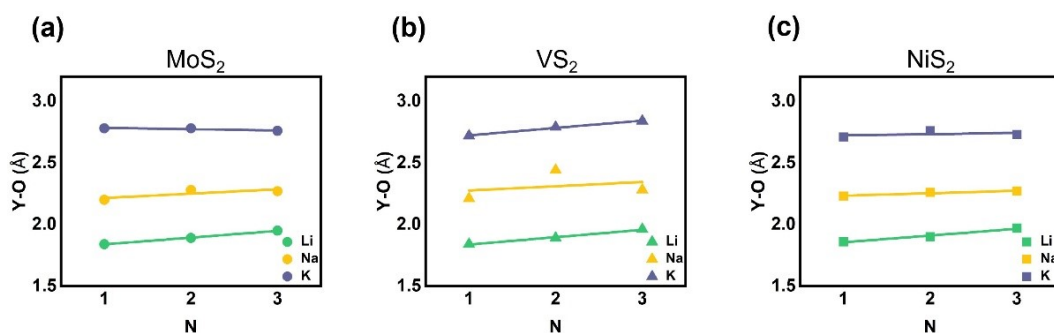

Figure S1. Evolution of Y-O bond lengths with hydration number in different 1T-phase metal sulfide systems. (a) 1T-MoS<sub>2</sub>, (b) 1T-VS<sub>2</sub>, and (c) 1T-NiS<sub>2</sub>.

Table S1. Y-O bond lengths (Å) of hydrated alkali metal ion systems (Y·mH<sub>2</sub>O) on 1T-MS<sub>2</sub> (M = Mo, V, Ni).

| 1T-MS <sub>2</sub> | Y  | m    |      |      |
|--------------------|----|------|------|------|
|                    |    | 1    | 2    | 3    |
| MoS <sub>2</sub>   | Li | 1.84 | 1.89 | 1.95 |
|                    | Na | 2.20 | 2.28 | 2.27 |
|                    | K  | 2.78 | 2.78 | 2.76 |
| VS <sub>2</sub>    | Li | 1.84 | 1.89 | 1.96 |
|                    | Na | 2.21 | 2.44 | 2.28 |
|                    | K  | 2.72 | 2.79 | 2.84 |
| NiS <sub>2</sub>   | Li | 1.86 | 1.90 | 1.97 |
|                    | Na | 2.23 | 2.26 | 2.27 |
|                    | K  | 2.71 | 2.76 | 2.73 |

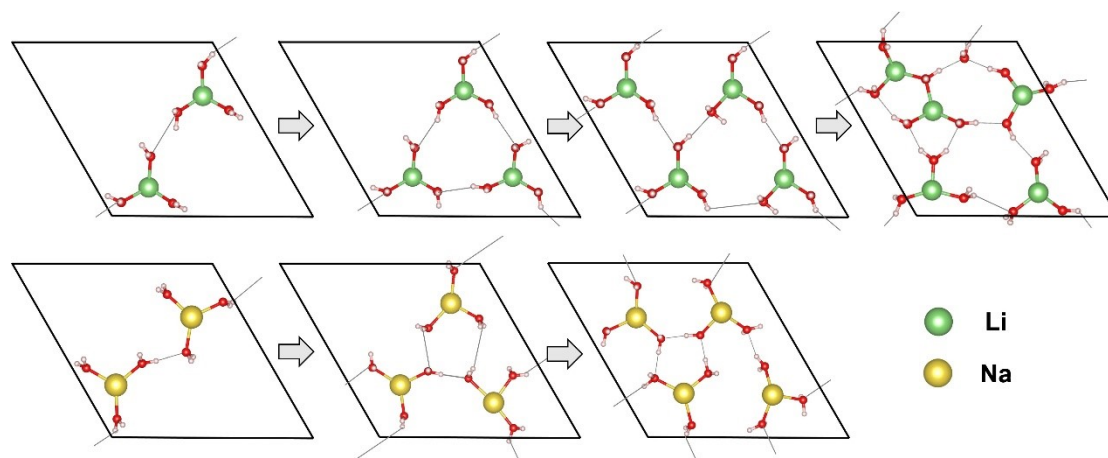

Figure S2. Evolution of hydrogen bond networks in different alkali metal hydrated ion systems. The green and yellow spheres represent Li and Na, respectively; the red and white spheres represent the oxygen and hydrogen atoms of water molecules, and the gray lines denote intermolecular hydrogen bonds.

Table S2. The variation in hydrogen bond lengths ( $\text{\AA}$ ) of hydrated alkali metal ions  $(Y \cdot 3H_2O)_n$  within  $MoS_2$  layers.

| Y  | n    |      |      |      |      |      |
|----|------|------|------|------|------|------|
|    | 2    | 3    | 4    | 5    | 6    | 7    |
| Li | 2.33 | 2.33 | 2.25 | 1.95 | 1.80 | 1.66 |
| Na | 2.07 | 2.00 | 1.91 | 1.76 | —    | —    |

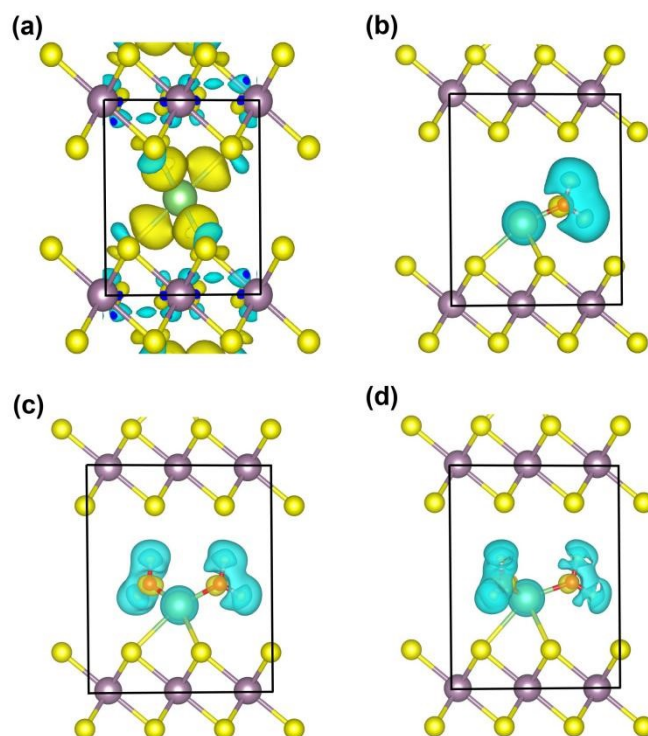

Figure S3. Differential charge density distributions of lithium ions with different degrees of hydration adsorbed on the 1T-phase MoS<sub>2</sub> surface. (a) Li adsorption system, (b) Li·1H<sub>2</sub>O adsorption system, (c) Li·2H<sub>2</sub>O adsorption system, (d) Li·3H<sub>2</sub>O adsorption system. The yellow regions represent electron-rich zones, whilst the cyan regions represent electron-depleted zones; the purple, yellow and cyan spheres represent Mo, S and Li atoms respectively, the red and white spheres represent the O and H atoms in water molecules respectively.
